sponse to steroid therapy [4]. However, relapse of the disease is common during the tapering period or after stopping steroid treatment [7]. CT, positron emission tomography/CT or MRI can be used to assess systemic involvement in patients with IgG4-related sclerosing disease [8].

In conclusion, we describe the first imaging report of IgG4-related sclerosing disease involving the paratesticu-

lar region and upper retroperitoneum, manifesting as paratesticular fibrous pseudotumor and retroperitoneal fibrosis, respectively. It is important to recognize that a paratesticular fibrous pseudotumor might be a systemic manifestation of IgG4-related sclerosing disease. Characteristic imaging findings, especially with MRI, combined with clinical and laboratory findings are essential for the accurate diagnosis of this rare entity.

## References

- 1 Dieckmann KP, Struss WJ, Frey U, Nahler-Wildenhain M: Paratesticular fibrous pseudotumor in young males presenting with histological features of IgG4-related disease: two case reports. *J Med Case Rep* 2013;7:225.
- 2 Bösmüller H, von Weyhern CH, Adam P, Alibegovic V, Mikuz G, Fend F: Paratesticular fibrous pseudotumor – an IgG4-related disorder? *Virchows Arch* 2011;458:109–113.
- 3 Hart PA, Moyer AM, Yi ES, Hogan MC, Pearson RK, Chari ST: IgG4-related paratesticular pseudotumor in a patient with autoimmune pancreatitis and retroperitoneal fibrosis: an extrapancreatic manifestation of IgG4-related disease. *Hum Pathol* 2012;43:2084–2087.
- 4 Vlachou PA, Khalili K, Jang HJ, Fischer S, Hirschfield GM, Kim TK: IgG4-related sclerosing disease: autoimmune pancreatitis and extrapancreatic manifestations. *Radiographics* 2011;31:1379–1402.
- 5 Okazaki K, Uchida K, Koyabu M, Miyoshi H, Takaoka M: Recent advances in the concept and diagnosis of autoimmune pancreatitis and IgG4-related disease. *J Gastroenterol* 2011;46:277–288.
- 6 Cassidy FH, Ishioka KM, McMahon CJ, Chu P, Sakamoto K, Lee KS, Aganovic L: MR imaging of scrotal tumors and pseudotumors. *Radiographics* 2010;30:665–683.
- 7 Ghazale A, Chari ST: Optimising corticosteroid treatment for autoimmune pancreatitis. *Gut* 2007;56:1650–1652.
- 8 Horger M, Lamprecht HG, Bares R, Spira D, Schmalzing M, Claussen CD, Adam P: Systemic IgG4-related sclerosing disease: spectrum of imaging findings and differential diagnosis. *AJR Am J Roentgenol* 2012;199:W276–W282.

## Erratum

In the article by Ha YS, Chihara Y, Yoon HY, Kim YJ, Kim TH, Woo SH, Yun SJ, Kim IY, Hirao Y, Kim WJ, entitled 'Downregulation of fumarate hydratase is related to tumorigenesis in sporadic renal cell cancer' [*Urol Int* 2013;90:233–239, DOI: 10.1159/000345608], affiliation c is wrongly spelled. It should read Kyungpook National University instead of Kyungbuk National University.
